# Supplementary material for: Association of the IgG N-glycome with the course of kidney function in type 2 diabetes
Source: PubMed Central journal article supplement (PMC7213753; doi:10.1136/bmjdrc-2019-001026), 2020-04-28
Supplement: bmjdrc-2019-001026supp001.pdf [file bmjdrc-2019-001026supp001.pdf]

**Supplementary Tables**

## Supplementary Table S1 - Derived traits description

Description of direct glycan peaks and derived traits measured in this study(5). Structure abbreviations are as follows: F,  $\alpha$ -1,6-linked core fucose; A, number of antenna's; B, bisecting GlcNAc  $\beta$ 1-4 linked to  $\beta$ 1-3 mannose; M, number of mannose residues; Gx, number of  $\beta$ 1-4 linked galactoses; [3]G1, galactose on the antenna of the  $\alpha$ 1-3 linked mannose; [6]G1, galactose on the antenna of the  $\alpha$ 1-6 linked mannose; Sx, number of sialic acids linked to galactose.

| GROUP                                 | DESCRIPTION |                          | FORMULA                                                        |                   |
|---------------------------------------|-------------|--------------------------|----------------------------------------------------------------|-------------------|
| Total IgG glycans (neutral + charged) | GP1         | FA1                      | <i>The percentage of FA1 glycan in total IgG glycans</i>       | $GP1 / GP * 100$  |
|                                       | GP2         | A2                       | <i>The percentage of A2 glycan in total IgG glycans</i>        | $GP2 / GP * 100$  |
|                                       | GP3         | A2B                      | <i>The percentage of A2B glycan in total IgG glycans</i>       | $GP3 / GP * 100$  |
|                                       | GP4         | FA2                      | <i>The percentage of FA2 glycan in total IgG glycans</i>       | $GP4 / GP * 100$  |
|                                       | GP5         | M5                       | <i>The percentage of M5 glycan in total IgG glycans</i>        | $GP5 / GP * 100$  |
|                                       | GP6         | FA2B                     | <i>The percentage of FA2B glycan in total IgG glycans</i>      | $GP6 / GP * 100$  |
|                                       | GP7         | A2[3]G1                  | <i>The percentage of A2G1 glycan in total IgG glycans</i>      | $GP7 / GP * 100$  |
|                                       | GP8         | A2BG1<br>FA2[6]G1        | <i>The percentage of FA2[6]G1 glycan in total IgG glycans</i>  | $GP8 / GP * 100$  |
|                                       | GP9         | FA2[3]G1                 | <i>The percentage of FA2[3]G1 glycan in total IgG glycans</i>  | $GP9 / GP * 100$  |
|                                       | GP10        | FA2[6]BG1                | <i>The percentage of FA2[6]BG1 glycan in total IgG glycans</i> | $GP10 / GP * 100$ |
|                                       | GP11        | FA2[3]BG1                | <i>The percentage of FA2[3]BG1 glycan in total IgG glycans</i> | $GP11 / GP * 100$ |
|                                       | GP12        | A2G2                     | <i>The percentage of A2G2 glycan in total IgG glycans</i>      | $GP12 / GP * 100$ |
|                                       | GP13        | A2BG2                    | <i>The percentage of A2BG2 glycan in total IgG glycans</i>     | $GP13 / GP * 100$ |
|                                       | GP14        | FA2G2                    | <i>The percentage of FA2G2 glycan in total IgG glycans</i>     | $GP14 / GP * 100$ |
|                                       | GP15        | FA2BG2                   | <i>The percentage of FA2BG2 glycan in total IgG glycans</i>    | $GP15 / GP * 100$ |
|                                       | GP16        | FA2[6]G1S1<br>FA2[3]G1S1 | <i>The percentage of FA2G1S1 glycan in total IgG glycans</i>   | $GP16 / GP * 100$ |
|                                       | GP17        | A2G2S1                   | <i>The percentage of A2G2S1 glycan in total IgG glycans</i>    | $GP17 / GP * 100$ |
|                                       | GP18        | A2BG2S1<br>FA2G2S1       | <i>The percentage of FA2G2S1 glycan in total IgG glycans</i>   | $GP18 / GP * 100$ |
|                                       | GP19        | FA2BG2S1                 | <i>The percentage of FA2BG2S1 glycan in total IgG glycans</i>  | $GP19 / GP * 100$ |
|                                       | GP20*       | FA2FG2S1                 | <i>The percentage of FA2FG2S1 in total IgG glycans*</i>        | $GP20 / GP * 100$ |
|                                       | GP21        | A2G2S2                   | <i>The percentage of A2G2S2 glycan in total IgG glycans</i>    | $GP21 / GP * 100$ |

|  |      |          |                                                               |                   |
|--|------|----------|---------------------------------------------------------------|-------------------|
|  | GP22 | A2BG2S2  | <i>The percentage of A2BG2S2 glycan in total IgG glycans</i>  | $GP22 / GP * 100$ |
|  | GP23 | FA2G2S2  | <i>The percentage of FA2G2S2 glycan in total IgG glycans</i>  | $GP23 / GP * 100$ |
|  | GP24 | FA2BG2S2 | <i>The percentage of FA2BG2S2 glycan in total IgG glycans</i> | $GP24 / GP * 100$ |

|                                               |                                                                                          |                                                                                                                                     |                                                                                    |
|-----------------------------------------------|------------------------------------------------------------------------------------------|-------------------------------------------------------------------------------------------------------------------------------------|------------------------------------------------------------------------------------|
| <i>Total IgG glycans - derived parameters</i> | FGS/(FG+FGS)                                                                             | <i>The percentage of sialylation of fucosylated galactosylated structures without bisecting GlcNAc in total IgG glycans</i>         | $SUM(GP16 + GP18 + GP23) / SUM(GP16 + GP18 + GP23 + GP8 + GP9 + GP14) * 100$       |
|                                               | FBGS/(FBG+FBGS)                                                                          | <i>The percentage of sialylation of fucosylated galactosylated structures with bisecting GlcNAc in total IgG glycans</i>            | $SUM(GP19 + GP24) / SUM(GP19 + GP24 + GP10 + GP11 + GP15) * 100$                   |
|                                               | FGS/(F+FG+FGS)                                                                           | <i>The percentage of sialylation of all fucosylated structures without bisecting GlcNAc in total IgG glycans</i>                    | $SUM(GP16 + GP18 + GP23) / SUM(GP16 + GP18 + GP23 + GP4 + GP8 + GP9 + GP14) * 100$ |
|                                               | FBGS/(FB+FBG+FBGS)                                                                       | <i>The percentage of sialylation of all fucosylated structures with bisecting GlcNAc in total IgG glycans</i>                       | $SUM(GP19 + GP24) / SUM(GP19 + GP24 + GP6 + GP10 + GP11 + GP15) * 100$             |
|                                               | FG1S1/(FG1+FG1S1)                                                                        | <i>The percentage of monosialylation of fucosylated monogalactosylated structures without bisecting GlcNAc in total IgG glycans</i> | $GP16 / SUM(GP16 + GP8 + GP9) * 100$                                               |
|                                               | FG2S1/(FG2+FG2S1+FG2S2)                                                                  | <i>The percentage of monosialylation of fucosylated digalactosylated structures without bisecting GlcNAc in total IgG glycans</i>   | $GP18 / SUM(GP18 + GP14 + GP23) * 100$                                             |
|                                               | FG2S2/(FG2+FG2S1+FG2S2)                                                                  | <i>The percentage of disialylation of fucosylated digalactosylated structures without bisecting GlcNAc in total IgG glycans</i>     | $GP23 / SUM(GP23 + GP14 + GP18) * 100$                                             |
|                                               | FBG2S1/(FBG2+FBG2S1+FBG2S2)                                                              | <i>The percentage of monosialylation of fucosylated digalactosylated structures with bisecting GlcNAc in total IgG glycans</i>      | $GP19 / SUM(GP19 + GP15 + GP24) * 100$                                             |
|                                               | FBG2S2/(FBG2+FBG2S1+FBG2S2)                                                              | <i>The percentage of disialylation of fucosylated digalactosylated structures with bisecting GlcNAc in total IgG glycans</i>        | $GP24 / SUM(GP24 + GP15 + GP19) * 100$                                             |
|                                               | $F^{total}S1/F^{total}S2$                                                                | <i>Ratio of all fucosylated monosialylated and disialylated structures (+/- bisecting GlcNAc) in total IgG glycans</i>              | $SUM(GP16 + GP18 + GP19) / SUM(GP23 + GP24)$                                       |
|                                               | FS1/FS2                                                                                  | <i>Ratio of fucosylated monosialylated and disialylated structures (without bisecting GlcNAc) in total IgG glycans</i>              | $SUM(GP16 + GP18) / GP23$                                                          |
|                                               | FBS1/FBS2                                                                                | <i>Ratio of fucosylated monosialylated and disialylated structures (with bisecting GlcNAc) in total IgG glycans</i>                 | $GP19 / GP24$                                                                      |
|                                               | $FBS^{total}/FS^{total}$                                                                 | <i>Ratio of all fucosylated sialylated structures with and without bisecting GlcNAc in total IgG glycans</i>                        | $SUM(GP19 + GP24) / SUM(GP16 + GP18 + GP23)$                                       |
|                                               | FBS1/FS1                                                                                 | <i>Ratio of fucosylated monosialylated structures with and without bisecting GlcNAc in total IgG glycans</i>                        | $GP19 / SUM(GP16 + GP18)$                                                          |
|                                               | FBS1/(FS1+FBS1)                                                                          | <i>The incidence of bisecting GlcNAc in all fucosylated monosialylated structures in total IgG glycans in total IgG glycans</i>     | $GP19 / SUM(GP16 + GP18 + GP19)$                                                   |
| FBS2/FS2                                      | <i>Ratio of fucosylated disialylated structures with and without bisecting GlcNAc in</i> | $GP24 / GP23$                                                                                                                       |                                                                                    |

|  |                 |                                                                                                          |                                  |
|--|-----------------|----------------------------------------------------------------------------------------------------------|----------------------------------|
|  |                 | <i>total IgG glycans</i>                                                                                 |                                  |
|  | FBS2/(FS2+FBS2) | <i>The incidence of bisecting GlcNAc in all fucosylated disialylated structures in total IgG glycans</i> | $GP24 / \text{SUM}(GP23 + GP24)$ |

|                            |                   |                                                                                         |                     |
|----------------------------|-------------------|-----------------------------------------------------------------------------------------|---------------------|
| <i>Neutral IgG glycans</i> | GP1 <sup>n</sup>  | <i>The percentage of FA1 glycan in total neutral IgG glycans (GP<sup>n</sup>)</i>       | $GP1 / GP^n * 100$  |
|                            | GP2 <sup>n</sup>  | <i>The percentage of A2 glycan in total neutral IgG glycans (GP<sup>n</sup>)</i>        | $GP2 / GP^n * 100$  |
|                            | GP4 <sup>n</sup>  | <i>The percentage of FA2 glycan in total neutral IgG glycans (GP<sup>n</sup>)</i>       | $GP4 / GP^n * 100$  |
|                            | GP5 <sup>n</sup>  | <i>The percentage of M5 glycan in total neutral IgG glycans (GP<sup>n</sup>)</i>        | $GP5 / GP^n * 100$  |
|                            | GP6 <sup>n</sup>  | <i>The percentage of FA2B glycan in total neutral IgG glycans (GP<sup>n</sup>)</i>      | $GP6 / GP^n * 100$  |
|                            | GP7 <sup>n</sup>  | <i>The percentage of A2G1 glycan in total neutral IgG glycans (GP<sup>n</sup>)</i>      | $GP7 / GP^n * 100$  |
|                            | GP8 <sup>n</sup>  | <i>The percentage of FA2[6]G1 glycan in total neutral IgG glycans (GP<sup>n</sup>)</i>  | $GP8 / GP^n * 100$  |
|                            | GP9 <sup>n</sup>  | <i>The percentage of FA2[3]G1 glycan in total neutral IgG glycans (GP<sup>n</sup>)</i>  | $GP9 / GP^n * 100$  |
|                            | GP10 <sup>n</sup> | <i>The percentage of FA2[6]BG1 glycan in total neutral IgG glycans (GP<sup>n</sup>)</i> | $GP10 / GP^n * 100$ |
|                            | GP11 <sup>n</sup> | <i>The percentage of FA2[3]BG1 glycan in total neutral IgG glycans (GP<sup>n</sup>)</i> | $GP11 / GP^n * 100$ |
|                            | GP12 <sup>n</sup> | <i>The percentage of A2G2 glycan in total neutral IgG glycans (GP<sup>n</sup>)</i>      | $GP12 / GP^n * 100$ |
|                            | GP13 <sup>n</sup> | <i>The percentage of A2BG2 glycan in total neutral IgG glycans (GP<sup>n</sup>)</i>     | $GP13 / GP^n * 100$ |
|                            | GP14 <sup>n</sup> | <i>The percentage of FA2G2 glycan in total neutral IgG glycans (GP<sup>n</sup>)</i>     | $GP14 / GP^n * 100$ |
|                            | GP15 <sup>n</sup> | <i>The percentage of FA2BG2 glycan in total neutral IgG glycans (GP<sup>n</sup>)</i>    | $GP15 / GP^n * 100$ |

|                              |                 |                                                                                     |                                    |
|------------------------------|-----------------|-------------------------------------------------------------------------------------|------------------------------------|
| <i>Neutral IgG glycans -</i> | G0 <sup>n</sup> | <i>The percentage of agalactosylated structures in total neutral IgG glycans</i>    | $\text{SUM}(GP1^n: GP4^n + GP6^n)$ |
|                              | G1 <sup>n</sup> | <i>The percentage of monogalactosylated structures in total neutral IgG glycans</i> | $\text{SUM}(GP7^n: GP11^n)$        |

|                           |                              |                                                                                                                                |                                                                                  |
|---------------------------|------------------------------|--------------------------------------------------------------------------------------------------------------------------------|----------------------------------------------------------------------------------|
| <i>derived parameters</i> | $G2^n$                       | <i>The percentage of digalactosylated structures in total neutral IgG glycans</i>                                              | $SUM(GP12^n; GP15^n)$                                                            |
|                           | $F^{n \text{ total}}$        | <i>The percentage of all fucosylated structures (+/- bisecting GlcNAc) in total neutral IgG glycans</i>                        | $SUM(GP1^n + GP4^n + GP6^n + GP8^n + GP9^n + GP10^n + GP11^n + GP14^n + GP15^n)$ |
|                           | $FG0^{n \text{ total}}/G0^n$ | <i>The percentage of fucosylation of agalactosylated structures in total neutral IgG glycans</i>                               | $SUM(GP1^n + GP4^n + GP6^n) / G0^n * 100$                                        |
|                           | $FG1^{n \text{ total}}/G1^n$ | <i>The percentage of fucosylation of monogalactosylated structures in total neutral IgG glycans</i>                            | $SUM(GP8^n + GP9^n + GP10^n + GP11^n) / G1^n * 100$                              |
|                           | $FG2^{n \text{ total}}/G2^n$ | <i>The percentage of fucosylation of digalactosylated structures in total neutral IgG glycans</i>                              | $SUM(GP14^n + GP15^n) / G2^n * 100$                                              |
|                           | $F^n$                        | <i>The percentage of fucosylated structures (without bisecting GlcNAc) in total neutral IgG glycans</i>                        | $SUM(GP1^n + GP4^n + GP8^n + GP9^n + GP14^n)$                                    |
|                           | $FG0^n/G0^n$                 | <i>The percentage of fucosylation of agalactosylated structures (without bisecting GlcNAc) in total neutral IgG glycans</i>    | $SUM(GP1^n + GP4^n) / G0^n * 100$                                                |
|                           | $FG1^n/G1^n$                 | <i>The percentage of fucosylation of monogalactosylated structures (without bisecting GlcNAc) in total neutral IgG glycans</i> | $SUM(GP8^n + GP9^n) / G1^n * 100$                                                |
|                           | $FG2^n/G2^n$                 | <i>The percentage of fucosylation of digalactosylated structures (without bisecting GlcNAc) in total neutral IgG glycans</i>   | $GP14^n / G2^n * 100$                                                            |
|                           | $FB^n$                       | <i>The percentage of fucosylated structures (with bisecting GlcNAc) in total neutral IgG glycans</i>                           | $SUM(GP6^n + GP10^n + GP11^n + GP15^n)$                                          |
|                           | $FBG0^n/G0^n$                | <i>The percentage of fucosylation of agalactosylated structures (with bisecting GlcNAc) in total neutral IgG glycans</i>       | $GP6^n / G0^n * 100$                                                             |
|                           | $FBG1^n/G1^n$                | <i>The percentage of fucosylation of monogalactosylated structures (with bisecting GlcNAc) in total neutral IgG glycans</i>    | $SUM(GP10^n + GP11^n) / G1^n * 100$                                              |
|                           | $FBG2^n/G2^n$                | <i>The percentage of fucosylation of digalactosylated structures (with bisecting GlcNAc) in total neutral IgG glycans</i>      | $GP15^n / G2^n * 100$                                                            |
|                           | $FB^n/F^n$                   | <i>Ratio of fucosylated structures with and without bisecting GlcNAc in total neutral IgG glycans</i>                          | $FB^n / F^n * 100$                                                               |
|                           | $FB^n/F^{n \text{ total}}$   | <i>The incidence of bisecting GlcNAc in all fucosylated structures in total neutral IgG glycans</i>                            | $FB^n / F^{n \text{ total}} * 100$                                               |

Supplementary Table S2 – associations eGFR percentage change per year

Associations between 58 IgG glycans and eGFR change per year. Glycan values are centered and scaled. Shown are the regression coefficient beta and p-value per association. The p-values that remained significant after correction for multiple comparisons (Bonferroni) are highlighted in green. Red represents a positive association and blue a negative association. The basic model was adjusted for age and sex and their interaction. Additionally, the full model was adjusted for smoking, MAP, BMI, Hba1c, duration of type 2 diabetes, nonHDL and HDL.

| Basic model                 |          |          | Full model                  |          |          |
|-----------------------------|----------|----------|-----------------------------|----------|----------|
| Number of tests             | 58       |          | Number of tests             | 58       |          |
| FDR (Q)                     | 0,05     |          | FDR (Q)                     | 0,05     |          |
| FDR $\alpha$                | 1,01E-02 |          | FDR $\alpha$                | 6,18E-03 |          |
| Glycan trait                | Beta     | P-value  | Glycan trait                | Beta     | P-value  |
| GP6                         | -1,38    | 7,76E-04 | FBS2/FS2                    | -0,78    | 3,20E-03 |
| FBS2/FS2                    | -1,38    | 4,16E-04 | FBn/Fn                      | -0,78    | 2,20E-03 |
| G0n                         | -1,32    | 1,84E-03 | GP6                         | -0,76    | 6,18E-03 |
| FBG2n/G2n                   | -1,27    | 1,42E-03 | FBG2n/G2n                   | -0,75    | 4,11E-03 |
| FBS2/(FS2+FBS2)             | -1,21    | 2,25E-03 | FBS2/(FS2+FBS2)             | -0,74    | 5,89E-03 |
| FBS2total/FS2total          | -1,16    | 3,94E-03 | FG2S1/(FG2+FG2S1+FG2S2)     | -0,74    | 2,66E-03 |
| GP4                         | -1,13    | 6,17E-03 | FB/Fntotal                  | -0,74    | 3,89E-03 |
| FBS1/(FS1+FBS1)             | -0,90    | 2,34E-02 | FBn                         | -0,72    | 4,73E-03 |
| FBS1/FS1                    | -0,90    | 2,36E-02 | FBG1n/G1n                   | -0,70    | 5,24E-03 |
| FBn/Fn                      | -0,77    | 4,35E-02 | FG1S1/(FG1+FG1S1)           | -0,60    | 1,57E-02 |
| FBG1n/G1n                   | -0,77    | 4,10E-02 | FBG0n/G0n                   | -0,49    | 4,77E-02 |
| FB/Fntotal                  | -0,74    | 5,20E-02 | GP11                        | -0,47    | 5,73E-02 |
| FBn                         | -0,73    | 5,64E-02 | GP2                         | -0,47    | 6,96E-02 |
| GP2                         | -0,64    | 1,01E-01 | GP10                        | -0,45    | 6,55E-02 |
| FBG2S2/(FBG2+FBG2S1+FBG2S2) | -0,39    | 3,04E-01 | G0n                         | -0,39    | 1,63E-01 |
| FBG0n/G0n                   | -0,35    | 3,46E-01 | FGS/(FG+FGS)                | -0,36    | 1,56E-01 |
| GP11                        | -0,30    | 4,22E-01 | GP5                         | -0,34    | 1,53E-01 |
| GP3                         | -0,30    | 4,31E-01 | FS1/FS2                     | -0,33    | 1,92E-01 |
| FG2S1/(FG2+FG2S1+FG2S2)     | -0,27    | 4,73E-01 | FBS2total/FS2total          | -0,31    | 2,31E-01 |
| GP10                        | -0,17    | 6,42E-01 | FBG2S2/(FBG2+FBG2S1+FBG2S2) | -0,25    | 3,06E-01 |
| GP1                         | -0,14    | 7,15E-01 | GP24                        | -0,24    | 3,18E-01 |
| FBG2S1/(FBG2+FBG2S1+FBG2S2) | -0,11    | 7,71E-01 | GP16                        | -0,23    | 3,45E-01 |
| GP7                         | -0,08    | 8,25E-01 | GP13                        | -0,21    | 3,95E-01 |

|                         |       |          |                             |       |          |
|-------------------------|-------|----------|-----------------------------|-------|----------|
| FG1S1/(FG1+FG1S1)       | -0,06 | 8,74E-01 | FBS1/FS1                    | -0,18 | 4,86E-01 |
| FS1/FS2                 | -0,04 | 9,18E-01 | FBS1/(FS1+FBS1)             | -0,17 | 5,26E-01 |
| GP24                    | 0,00  | 9,89E-01 | GP4                         | -0,13 | 6,32E-01 |
| FG2S2/(FG2+FG2S1+FG2S2) | 0,01  | 9,71E-01 | GP7                         | -0,11 | 6,50E-01 |
| GP17                    | 0,10  | 7,82E-01 | FGS/(F+FG+FGS)              | -0,09 | 7,40E-01 |
| FBGS/(FBG+FBGS)         | 0,15  | 6,98E-01 | GP19                        | -0,09 | 7,26E-01 |
| GP19                    | 0,16  | 6,77E-01 | GP15                        | -0,09 | 7,38E-01 |
| Fntotal                 | 0,17  | 6,52E-01 | GP20                        | -0,03 | 9,01E-01 |
| FG0ntotal/G0n           | 0,18  | 6,29E-01 | GP21                        | -0,01 | 9,74E-01 |
| GP22                    | 0,24  | 5,18E-01 | GP3                         | 0,03  | 8,98E-01 |
| GP12                    | 0,25  | 5,02E-01 | FG2ntotal/G2n               | 0,03  | 8,87E-01 |
| FG1ntotal/G1n           | 0,26  | 4,79E-01 | GP18                        | 0,07  | 8,02E-01 |
| FBS1/FBS2               | 0,30  | 4,18E-01 | FtotalS1/FtotalS2           | 0,09  | 7,29E-01 |
| FG2ntotal/G2n           | 0,33  | 3,77E-01 | GP22                        | 0,11  | 6,71E-01 |
| GP15                    | 0,34  | 3,92E-01 | GP1                         | 0,11  | 6,55E-01 |
| FG0n/G0n                | 0,36  | 3,33E-01 | FBG2S1/(FBG2+FBG2S1+FBG2S2) | 0,13  | 6,19E-01 |
| FGS/(FG+FGS)            | 0,36  | 3,50E-01 | FG2S2/(FG2+FG2S1+FG2S2)     | 0,13  | 5,97E-01 |
| GP13                    | 0,36  | 3,32E-01 | GP17                        | 0,13  | 5,72E-01 |
| GP21                    | 0,40  | 2,94E-01 | FG1ntotal/G1n               | 0,14  | 5,62E-01 |
| GP20                    | 0,41  | 2,75E-01 | FBGS/(FBG+FBGS)             | 0,16  | 5,32E-01 |
| GP5                     | 0,55  | 1,35E-01 | Fntotal                     | 0,17  | 4,85E-01 |
| FBGS/(FB+FBG+FBGS)      | 0,56  | 1,41E-01 | GP12                        | 0,20  | 4,03E-01 |
| FtotalS1/FtotalS2       | 0,65  | 9,57E-02 | FBGS/(FB+FBG+FBGS)          | 0,26  | 3,15E-01 |
| GP16                    | 0,69  | 6,57E-02 | FG0ntotal/G0n               | 0,27  | 2,82E-01 |
| Fn                      | 0,71  | 6,37E-02 | GP23                        | 0,32  | 2,29E-01 |
| GP23                    | 0,78  | 4,81E-02 | G1n                         | 0,34  | 1,98E-01 |
| FG1n/G1n                | 0,80  | 3,50E-02 | FBS1/FBS2                   | 0,35  | 1,42E-01 |
| FGS/(F+FG+FGS)          | 0,85  | 4,00E-02 | G2n                         | 0,36  | 2,05E-01 |
| GP18                    | 0,89  | 3,67E-02 | GP9                         | 0,44  | 8,31E-02 |
| G2n                     | 0,98  | 2,33E-02 | GP14                        | 0,49  | 9,15E-02 |
| GP9                     | 1,05  | 5,65E-03 | FG2n/G2n                    | 0,51  | 4,86E-02 |
| FG2n/G2n                | 1,08  | 6,09E-03 | FG0n/G0n                    | 0,51  | 3,95E-02 |
| GP14                    | 1,12  | 1,01E-02 | GP8                         | 0,61  | 1,56E-02 |
| GP8                     | 1,18  | 2,28E-03 | Fn                          | 0,70  | 5,70E-03 |

|     |      |          |          |      |          |
|-----|------|----------|----------|------|----------|
| G1n | 1,43 | 3,51E-04 | FG1n/G1n | 0,71 | 4,71E-03 |
|-----|------|----------|----------|------|----------|



Supplementary Table S3 – associations eGFR percentage change during total follow-up

Associations between 58 IgG glycans and eGFR change during total follow-up. Glycan values are centered and scaled. Shown are the regression coefficient beta and p-value per association. The p-values that remained significant after correction for multiple comparisons (Bonferroni) are highlighted in green. Red represents a negative association and blue a positive association. The basic model was adjusted for age and sex and their interaction. Additionally, the full model was adjusted for smoking, MAP, BMI, Hba1c, duration of type 2 diabetes, nonHDL, HDL and duration of follow-up.

| Percentage change of eGFR during total follow-up |          |          |                             |       |          |
|--------------------------------------------------|----------|----------|-----------------------------|-------|----------|
| Basic model                                      |          |          | Full model                  |       |          |
| Number of tests                                  | 58       |          | Number of tests             | 58    |          |
| FDR (Q)                                          | 0,05     |          | FDR (Q)                     | 0,05  |          |
| FDR $\alpha$                                     | 5,20E-03 |          | FDR $\alpha$                | -     |          |
| Glycan trait                                     | Beta     | P-value  | Glycan trait                | Beta  | P-value  |
| G0n                                              | -2,39    | 4,35E-04 | G0n                         | -2,35 | 1,81E-03 |
| GP6                                              | -2,36    | 3,53E-04 | GP6                         | -1,92 | 9,57E-03 |
| GP4                                              | -1,85    | 5,20E-03 | GP4                         | -1,87 | 1,03E-02 |
| FG2S1/(FG2+FG2S1+FG2S2)                          | -1,46    | 1,52E-02 | FBG2S2/(FBG2+FBG2S1+FBG2S2) | -1,81 | 5,22E-03 |
| FBG2S2/(FBG2+FBG2S1+FBG2S2)                      | -1,35    | 2,64E-02 | FG2S1/(FG2+FG2S1+FG2S2)     | -1,74 | 7,74E-03 |
| FBG2n/G2n                                        | -1,34    | 3,58E-02 | FG2S2/(FG2+FG2S1+FG2S2)     | -1,24 | 6,55E-02 |
| FBn                                              | -1,23    | 4,42E-02 | FG1S1/(FG1+FG1S1)           | -1,22 | 6,27E-02 |
| FB/Fntotal                                       | -1,20    | 4,91E-02 | GP21                        | -1,11 | 1,05E-01 |
| FBn/Fn                                           | -1,20    | 5,01E-02 | FBG2n/G2n                   | -0,98 | 1,58E-01 |
| FBG1n/G1n                                        | -1,12    | 6,39E-02 | FGS/(FG+FGS)                | -0,81 | 2,31E-01 |
| FG1S1/(FG1+FG1S1)                                | -1,10    | 6,70E-02 | FBS2/(FS2+FBS2)             | -0,79 | 2,71E-01 |
| FBS2/(FS2+FBS2)                                  | -0,98    | 1,25E-01 | FBn                         | -0,71 | 2,92E-01 |
| FBS2/FS2                                         | -0,92    | 1,44E-01 | FBS2/FS2                    | -0,70 | 3,16E-01 |
| FG2S2/(FG2+FG2S1+FG2S2)                          | -0,67    | 2,75E-01 | FBStotal/FStotal            | -0,70 | 3,14E-01 |
| GP2                                              | -0,65    | 2,97E-01 | FBn/Fn                      | -0,68 | 3,14E-01 |

|                                                                                 |       |          |                                                                                 |       |          |
|---------------------------------------------------------------------------------|-------|----------|---------------------------------------------------------------------------------|-------|----------|
| FBS <sub>total</sub> /FS <sub>total</sub>                                       | -0,61 | 3,42E-01 | FB/F <sub>ntotal</sub>                                                          | -0,68 | 3,15E-01 |
| FBG <sub>0n</sub> /G <sub>0n</sub>                                              | -0,58 | 3,30E-01 | FBG <sub>1n</sub> /G <sub>1n</sub>                                              | -0,61 | 3,60E-01 |
| GP21                                                                            | -0,50 | 4,09E-01 | GP2                                                                             | -0,47 | 4,94E-01 |
| FGS/(FG+FGS)                                                                    | -0,49 | 4,34E-01 | GP5                                                                             | -0,46 | 4,66E-01 |
| GP5                                                                             | -0,40 | 5,03E-01 | FBGS/(FBG+FBGS)                                                                 | -0,44 | 5,08E-01 |
| FBS <sub>1</sub> /(FS <sub>1</sub> +FBS <sub>1</sub> )                          | -0,26 | 6,90E-01 | GP24                                                                            | -0,43 | 5,09E-01 |
| GP10                                                                            | -0,24 | 6,87E-01 | GP22                                                                            | -0,42 | 5,28E-01 |
| FBS <sub>1</sub> /FS <sub>1</sub>                                               | -0,22 | 7,32E-01 | GP1                                                                             | -0,40 | 5,47E-01 |
| GP3                                                                             | -0,14 | 8,21E-01 | FBS <sub>1</sub> /(FS <sub>1</sub> +FBS <sub>1</sub> )                          | -0,34 | 6,22E-01 |
| GP11                                                                            | -0,14 | 8,20E-01 | FBS <sub>1</sub> /FS <sub>1</sub>                                               | -0,33 | 6,35E-01 |
| FG <sub>0ntotal</sub> /G <sub>0n</sub>                                          | -0,14 | 8,21E-01 | FG <sub>0ntotal</sub> /G <sub>0n</sub>                                          | -0,24 | 7,17E-01 |
| F <sub>ntotal</sub>                                                             | -0,12 | 8,41E-01 | F <sub>ntotal</sub>                                                             | -0,23 | 7,26E-01 |
| GP20                                                                            | -0,10 | 8,70E-01 | FBG <sub>0n</sub> /G <sub>0n</sub>                                              | -0,20 | 7,64E-01 |
| GP1                                                                             | -0,07 | 9,06E-01 | FG <sub>1ntotal</sub> /G <sub>1n</sub>                                          | -0,10 | 8,75E-01 |
| GP22                                                                            | -0,02 | 9,70E-01 | GP16                                                                            | -0,06 | 9,25E-01 |
| GP24                                                                            | 0,03  | 9,66E-01 | FBG <sub>2S1</sub> /(FBG <sub>2</sub> +FBG <sub>2S1</sub> +FBG <sub>2S2</sub> ) | -0,02 | 9,81E-01 |
| FG <sub>1ntotal</sub> /G <sub>1n</sub>                                          | 0,07  | 9,01E-01 | FG <sub>2ntotal</sub> /G <sub>2n</sub>                                          | -0,01 | 9,91E-01 |
| FG <sub>2ntotal</sub> /G <sub>2n</sub>                                          | 0,09  | 8,81E-01 | GP3                                                                             | 0,00  | 9,95E-01 |
| GP16                                                                            | 0,17  | 7,77E-01 | GP23                                                                            | 0,04  | 9,56E-01 |
| GP7                                                                             | 0,21  | 7,20E-01 | FG <sub>0n</sub> /G <sub>0n</sub>                                               | 0,10  | 8,86E-01 |
| GP17                                                                            | 0,23  | 6,96E-01 | GP11                                                                            | 0,15  | 8,23E-01 |
| FBGS/(FBG+FBGS)                                                                 | 0,26  | 6,65E-01 | GP17                                                                            | 0,23  | 7,16E-01 |
| FBG <sub>2S1</sub> /(FBG <sub>2</sub> +FBG <sub>2S1</sub> +FBG <sub>2S2</sub> ) | 0,27  | 6,58E-01 | GP10                                                                            | 0,26  | 6,88E-01 |
| FS <sub>1</sub> /FS <sub>2</sub>                                                | 0,39  | 5,17E-01 | GP7                                                                             | 0,32  | 6,23E-01 |
| FG <sub>0n</sub> /G <sub>0n</sub>                                               | 0,46  | 4,41E-01 | GP20                                                                            | 0,38  | 5,57E-01 |
| GP23                                                                            | 0,65  | 3,05E-01 | FBGS/(FB+FBG+FBGS)                                                              | 0,47  | 4,84E-01 |
| GP12                                                                            | 0,79  | 1,89E-01 | GP19                                                                            | 0,54  | 4,09E-01 |
| FGS/(F+FG+FGS)                                                                  | 0,86  | 1,95E-01 | F <sub>n</sub>                                                                  | 0,56  | 4,12E-01 |

|                    |      |          |                   |      |          |
|--------------------|------|----------|-------------------|------|----------|
| GP13               | 0,87 | 1,47E-01 | FGS/(F+FG+FGS)    | 0,56 | 4,37E-01 |
| GP19               | 0,91 | 1,32E-01 | FG1n/G1n          | 0,58 | 3,85E-01 |
| FG2n/G2n           | 0,93 | 1,41E-01 | FG2n/G2n          | 0,63 | 3,62E-01 |
| Fn                 | 1,06 | 8,44E-02 | GP13              | 0,77 | 2,29E-01 |
| FG1n/G1n           | 1,11 | 6,76E-02 | GP12              | 0,82 | 2,06E-01 |
| FtotalS1/FtotalS2  | 1,16 | 6,35E-02 | FS1/FS2           | 0,86 | 1,97E-01 |
| GP15               | 1,16 | 6,78E-02 | GP18              | 0,90 | 2,32E-01 |
| FBGS/(FB+FBG+FBGS) | 1,17 | 5,55E-02 | GP15              | 1,39 | 4,23E-02 |
| GP18               | 1,20 | 8,11E-02 | FtotalS1/FtotalS2 | 1,53 | 2,19E-02 |
| FBS1/FBS2          | 1,43 | 1,63E-02 | GP9               | 1,59 | 1,79E-02 |
| GP9                | 1,72 | 4,52E-03 | FBS1/FBS2         | 1,67 | 9,02E-03 |
| G2n                | 1,98 | 4,30E-03 | G2n               | 1,88 | 1,37E-02 |
| GP8                | 1,99 | 1,26E-03 | GP8               | 1,89 | 5,07E-03 |
| GP14               | 2,12 | 2,38E-03 | GP14              | 2,04 | 7,83E-03 |
| G1n                | 2,36 | 2,33E-04 | G1n               | 2,37 | 8,82E-04 |

Supplementary Table S4 – associations ACR percentage change per year

Associations between 58 IgG glycans and ACR change per year. Glycan values are centered and scaled. Shown are the regression coefficient beta and p-value per association. The p-values that remained significant after correction for multiple comparisons (Bonferonni) are highlighted in green. Red represents a positive association and blue a negative association. The basic model was adjusted for age and sex and their interaction. Additionally, the full model was adjusted for smoking, MAP, BMI, Hba1c, duration of type 2 diabetes, ACE-inhibitor, nonHDL and HDL.

| ACR percentage change per year |        |          |                             |        |          |
|--------------------------------|--------|----------|-----------------------------|--------|----------|
| Basic model                    |        |          | Full model                  |        |          |
| Number of tests                | 58     |          | Number of tests             | 58     |          |
| FDR (Q)                        | 0,05   |          | FDR (Q)                     | 0,05   |          |
| FDR $\alpha$                   | -      |          | FDR $\alpha$                | -      |          |
| Glycan trait                   | Beta   | P-value  | Glycan trait                | Beta   | P-value  |
| FBGS/(FBG+FBGS)                | -35,40 | 4,69E-02 | FBGS/(FBG+FBGS)             | -30,47 | 1,44E-01 |
| FG1n/G1n                       | -33,71 | 6,37E-02 | GP3                         | -29,43 | 1,91E-01 |
| FBG2S1/(FBG2+FBG2S1+FBG2S2)    | -30,80 | 9,55E-02 | FBG2S1/(FBG2+FBG2S1+FBG2S2) | -29,04 | 1,81E-01 |
| Fn                             | -26,57 | 1,48E-01 | GP1                         | -27,09 | 2,02E-01 |
| GP3                            | -26,20 | 1,71E-01 | FBGS/(FB+FBG+FBGS)          | -21,53 | 3,16E-01 |
| FBGS/(FB+FBG+FBGS)             | -26,05 | 1,51E-01 | FG1n/G1n                    | -20,92 | 3,31E-01 |
| FG0n/G0n                       | -23,41 | 1,92E-01 | GP19                        | -19,98 | 3,47E-01 |
| GP4                            | -22,70 | 2,62E-01 | FBS1/(FS1+FBS1)             | -19,94 | 3,69E-01 |
| FG2S2/(FG2+FG2S1+FG2S2)        | -22,22 | 2,20E-01 | FBS1/FS1                    | -18,81 | 3,94E-01 |
| GP9                            | -22,07 | 2,28E-01 | GP17                        | -17,86 | 4,14E-01 |
| GP1                            | -21,66 | 2,37E-01 | GP13                        | -15,66 | 4,51E-01 |
| G0n                            | -19,90 | 3,39E-01 | GP7                         | -15,59 | 4,55E-01 |

|                             |        |          |                             |        |          |
|-----------------------------|--------|----------|-----------------------------|--------|----------|
| FBG2S2/(FBG2+FBG2S1+FBG2S2) | -18,88 | 2,93E-01 | FBStotal/FStotal            | -15,04 | 4,95E-01 |
| FG2n/G2n                    | -18,48 | 3,40E-01 | GP12                        | -14,80 | 4,78E-01 |
| FBS1/(FS1+FBS1)             | -15,66 | 4,16E-01 | GP21                        | -14,61 | 5,13E-01 |
| FBS1/FS1                    | -14,84 | 4,38E-01 | FBS1/FBS2                   | -14,26 | 4,88E-01 |
| GP19                        | -12,74 | 4,81E-01 | GP2                         | -14,12 | 5,21E-01 |
| GP23                        | -12,24 | 5,17E-01 | GP20                        | -13,55 | 5,07E-01 |
| FBStotal/FStotal            | -11,57 | 5,48E-01 | G0n                         | -12,84 | 6,02E-01 |
| GP20                        | -8,90  | 6,18E-01 | GP4                         | -12,76 | 5,94E-01 |
| GP2                         | -7,57  | 6,80E-01 | Fn                          | -11,73 | 5,91E-01 |
| GP24                        | -7,53  | 6,67E-01 | FG2n/G2n                    | -9,12  | 6,88E-01 |
| GP21                        | -6,24  | 7,29E-01 | FG2S2/(FG2+FG2S1+FG2S2)     | -8,96  | 6,77E-01 |
| FBS1/FBS2                   | -4,97  | 7,80E-01 | GP24                        | -8,42  | 6,78E-01 |
| GP17                        | -3,29  | 8,51E-01 | FBG2S2/(FBG2+FBG2S1+FBG2S2) | -7,27  | 7,22E-01 |
| GP7                         | -3,21  | 8,57E-01 | GP9                         | -6,00  | 7,83E-01 |
| FG2ntotal/G2n               | -0,80  | 9,65E-01 | GP14                        | -3,42  | 8,91E-01 |
| GP22                        | 2,03   | 9,09E-01 | FG0n/G0n                    | -3,19  | 8,81E-01 |
| GP13                        | 2,77   | 8,78E-01 | GP23                        | -2,13  | 9,24E-01 |
| Fntotal                     | 3,05   | 8,64E-01 | G2n                         | -1,28  | 9,59E-01 |
| FG0ntotal/G0n               | 4,60   | 7,97E-01 | FBS2/(FS2+FBS2)             | -1,10  | 9,62E-01 |
| GP12                        | 4,90   | 7,85E-01 | GP5                         | -0,54  | 9,79E-01 |
| FG1S1/(FG1+FG1S1)           | 4,99   | 7,80E-01 | GP22                        | 0,05   | 9,98E-01 |
| FGS/(FG+FGS)                | 5,20   | 7,79E-01 | FBS2/FS2                    | 0,24   | 9,91E-01 |
| GP16                        | 5,76   | 7,50E-01 | GP6                         | 3,03   | 8,99E-01 |

|                         |       |          |                         |       |          |
|-------------------------|-------|----------|-------------------------|-------|----------|
| FG1ntotal/G1n           | 6,02  | 7,37E-01 | FGS/(FG+FGS)            | 8,74  | 6,84E-01 |
| FBS2/(FS2+FBS2)         | 8,92  | 6,39E-01 | FBG0n/G0n               | 9,03  | 6,70E-01 |
| FBS2/FS2                | 9,15  | 6,23E-01 | GP11                    | 9,19  | 6,58E-01 |
| GP6                     | 10,39 | 6,04E-01 | FS1/FS2                 | 10,63 | 6,18E-01 |
| FG2S1/(FG2+FG2S1+FG2S2) | 12,04 | 5,01E-01 | FG2ntotal/G2n           | 12,58 | 5,59E-01 |
| GP14                    | 12,65 | 5,53E-01 | GP18                    | 12,75 | 5,98E-01 |
| GP11                    | 12,75 | 4,79E-01 | FtotalS1/FtotalS2       | 13,29 | 5,30E-01 |
| GP5                     | 13,43 | 4,63E-01 | GP15                    | 13,42 | 5,45E-01 |
| GP8                     | 13,94 | 4,57E-01 | FG0ntotal/G0n           | 14,52 | 4,93E-01 |
| G2n                     | 15,49 | 4,63E-01 | FGS/(F+FG+FGS)          | 14,65 | 5,29E-01 |
| FGS/(F+FG+FGS)          | 15,52 | 4,40E-01 | GP8                     | 14,75 | 4,96E-01 |
| GP18                    | 15,92 | 4,46E-01 | FG1S1/(FG1+FG1S1)       | 16,34 | 4,36E-01 |
| G1n                     | 20,64 | 2,95E-01 | Fntotal                 | 17,32 | 4,09E-01 |
| FS1/FS2                 | 21,33 | 2,34E-01 | FBn/Fn                  | 17,34 | 4,24E-01 |
| FtotalS1/FtotalS2       | 21,95 | 2,37E-01 | FG1ntotal/G1n           | 18,20 | 3,84E-01 |
| FBG2n/G2n               | 26,96 | 1,62E-01 | FB/Fntotal              | 18,29 | 4,01E-01 |
| FBG0n/G0n               | 28,57 | 1,09E-01 | FBn                     | 19,94 | 3,59E-01 |
| FBn/Fn                  | 29,34 | 1,09E-01 | FG2S1/(FG2+FG2S1+FG2S2) | 22,62 | 2,75E-01 |
| FB/Fntotal              | 30,18 | 9,98E-02 | GP16                    | 23,75 | 2,56E-01 |
| GP15                    | 30,68 | 1,06E-01 | FBG1n/G1n               | 24,36 | 2,54E-01 |
| FBn                     | 30,82 | 9,23E-02 | G1n                     | 25,99 | 2,63E-01 |
| FBG1n/G1n               | 35,30 | 5,09E-02 | FBG2n/G2n               | 28,22 | 2,04E-01 |
| GP10                    | 40,03 | 2,56E-02 | GP10                    | 30,30 | 1,50E-01 |

Supplementary Table S5 – associations percentage change of ACR during total follow-up

Associations between 58 IgG glycans and ACR change during total follow-up. Glycan values are centered and scaled. Shown are the regression coefficient beta and p-value per association. The p-values that remained significant after correction for multiple comparisons (Bonferonni) are highlighted in green. Red represents a positive association and blue a negative association. The basic model was adjusted for age and sex and their interaction. Additionally, the full model was adjusted for smoking, MAP, BMI, Hba1c, duration of type 2 diabetes, ACE-inhibitor, nonHDL, HDL and duration of follow-up.

| Percentage change of ACR during total follow-up |         |          |                             |         |          |
|-------------------------------------------------|---------|----------|-----------------------------|---------|----------|
| Basic model                                     |         |          | Full model                  |         |          |
| Number of tests                                 | 58      |          | Number of tests             | 58      |          |
| FDR (Q)                                         | 0,05    |          | FDR (Q)                     | 0,05    |          |
| FDR $\alpha$                                    | -       |          | FDR $\alpha$                | -       |          |
| Glycan trait                                    | Beta    | P-value  | Glycan trait                | Beta    | P-value  |
| FBGS/(FBG+FBGS)                                 | -196,80 | 3,58E-02 | FBGS/(FBG+FBGS)             | -173,92 | 1,16E-01 |
| FG1n/G1n                                        | -159,70 | 9,53E-02 | GP1                         | -166,81 | 1,41E-01 |
| FBG2S1/(FBG2+FBG2S1+FBG2S2)                     | -148,91 | 1,25E-01 | FBG2S1/(FBG2+FBG2S1+FBG2S2) | -164,98 | 1,53E-01 |
| FBGS/(FB+FBG+FBGS)                              | -141,28 | 1,39E-01 | FBS1/(FS1+FBS1)             | -141,83 | 2,32E-01 |
| FG2S2/(FG2+FG2S1+FG2S2)                         | -133,49 | 1,61E-01 | FBS1/FS1                    | -133,03 | 2,59E-01 |
| Fn                                              | -124,04 | 1,99E-01 | FG1n/G1n                    | -126,29 | 2,70E-01 |
| FBG2S2/(FBG2+FBG2S1+FBG2S2)                     | -123,58 | 1,89E-01 | GP3                         | -121,85 | 2,98E-01 |
| GP4                                             | -122,42 | 2,49E-01 | FBGS/(FB+FBG+FBGS)          | -119,86 | 2,93E-01 |
| FBS1/(FS1+FBS1)                                 | -116,92 | 2,48E-01 | FBStotal/FStotal            | -117,82 | 3,17E-01 |
| FG0n/G0n                                        | -113,70 | 2,27E-01 | GP4                         | -111,86 | 3,80E-01 |
| FBS1/FS1                                        | -113,01 | 2,61E-01 | G0n                         | -103,71 | 4,29E-01 |
| G0n                                             | -112,07 | 3,05E-01 | GP19                        | -101,72 | 3,68E-01 |
| GP1                                             | -110,59 | 2,53E-01 | Fn                          | -91,40  | 4,30E-01 |
| FBStotal/FStotal                                | -105,84 | 2,96E-01 | FG2S2/(FG2+FG2S1+FG2S2)     | -77,22  | 4,98E-01 |
| GP3                                             | -83,79  | 3,98E-01 | GP7                         | -70,40  | 5,24E-01 |

|                         |        |          |                             |        |          |
|-------------------------|--------|----------|-----------------------------|--------|----------|
| GP19                    | -82,62 | 3,85E-01 | FG0n/G0n                    | -67,04 | 5,54E-01 |
| GP23                    | -75,28 | 4,48E-01 | FBG2S2/(FBG2+FBG2S1+FBG2S2) | -65,52 | 5,43E-01 |
| GP24                    | -62,30 | 5,01E-01 | GP2                         | -58,26 | 6,17E-01 |
| GP2                     | -52,80 | 5,83E-01 | GP17                        | -57,51 | 6,19E-01 |
| GP9                     | -45,69 | 6,33E-01 | GP12                        | -55,13 | 6,19E-01 |
| GP7                     | -42,79 | 6,47E-01 | GP13                        | -55,07 | 6,19E-01 |
| FG2n/G2n                | -42,02 | 6,77E-01 | FBS1/FBS2                   | -50,31 | 6,44E-01 |
| GP17                    | -37,79 | 6,81E-01 | GP24                        | -46,95 | 6,64E-01 |
| GP22                    | -36,32 | 6,91E-01 | GP5                         | -40,56 | 7,14E-01 |
| GP20                    | -21,00 | 8,23E-01 | FG2n/G2n                    | -36,13 | 7,62E-01 |
| GP12                    | -10,16 | 9,14E-01 | GP21                        | -29,96 | 7,98E-01 |
| GP13                    | -5,97  | 9,50E-01 | GP20                        | -27,10 | 8,04E-01 |
| GP21                    | -5,82  | 9,51E-01 | GP23                        | -19,84 | 8,66E-01 |
| FBS1/FBS2               | 7,30   | 9,38E-01 | GP22                        | -12,34 | 9,20E-01 |
| FGS/(FG+FGS)            | 20,97  | 8,29E-01 | FBS2/(FS2+FBS2)             | -8,56  | 9,44E-01 |
| FG0ntotal/G0n           | 28,17  | 7,64E-01 | FBS2/FS2                    | -1,97  | 9,87E-01 |
| FBS2/(FS2+FBS2)         | 31,89  | 7,50E-01 | GP9                         | 1,87   | 9,87E-01 |
| FBS2/FS2                | 33,98  | 7,29E-01 | GP14                        | 8,39   | 9,50E-01 |
| GP5                     | 38,65  | 6,86E-01 | G2n                         | 22,05  | 8,67E-01 |
| FG2ntotal/G2n           | 38,67  | 6,80E-01 | GP6                         | 24,20  | 8,49E-01 |
| Fntotal                 | 40,69  | 6,64E-01 | FG0ntotal/G0n               | 41,68  | 7,11E-01 |
| GP6                     | 46,19  | 6,61E-01 | FG2ntotal/G2n               | 57,87  | 6,04E-01 |
| GP14                    | 55,76  | 6,19E-01 | FGS/(FG+FGS)                | 63,89  | 5,74E-01 |
| FG1S1/(FG1+FG1S1)       | 58,72  | 5,33E-01 | Fntotal                     | 67,70  | 5,42E-01 |
| FG2S1/(FG2+FG2S1+FG2S2) | 59,00  | 5,31E-01 | GP8                         | 72,56  | 5,31E-01 |
| FG1ntotal/G1n           | 61,75  | 5,11E-01 | GP15                        | 83,93  | 4,76E-01 |
| G2n                     | 62,91  | 5,71E-01 | FG1ntotal/G1n               | 85,81  | 4,38E-01 |



|                   |        |          |                         |        |          |
|-------------------|--------|----------|-------------------------|--------|----------|
| GP18              | 74,27  | 4,96E-01 | GP18                    | 90,39  | 4,83E-01 |
| GP8               | 77,01  | 4,34E-01 | FBG0n/G0n               | 92,85  | 4,10E-01 |
| FGS/(F+FG+FGS)    | 80,96  | 4,41E-01 | GP11                    | 98,78  | 3,72E-01 |
| GP16              | 87,15  | 3,58E-01 | FGS/(F+FG+FGS)          | 110,69 | 3,71E-01 |
| FBG2n/G2n         | 116,45 | 2,53E-01 | FBn/Fn                  | 119,62 | 3,00E-01 |
| GP11              | 117,30 | 2,17E-01 | FB/Fntotal              | 122,55 | 2,90E-01 |
| GP15              | 132,35 | 1,84E-01 | FG2S1/(FG2+FG2S1+FG2S2) | 123,81 | 2,61E-01 |
| FBG0n/G0n         | 141,73 | 1,31E-01 | FG1S1/(FG1+FG1S1)       | 124,09 | 2,67E-01 |
| G1n               | 143,39 | 1,65E-01 | FS1/FS2                 | 125,97 | 2,68E-01 |
| FBn/Fn            | 148,65 | 1,23E-01 | FBG2n/G2n               | 127,99 | 2,82E-01 |
| FB/Fntotal        | 150,25 | 1,20E-01 | FBn                     | 129,85 | 2,62E-01 |
| FBn               | 155,57 | 1,07E-01 | FBG1n/G1n               | 143,63 | 2,07E-01 |
| FS1/FS2           | 165,15 | 8,07E-02 | FtotalS1/FtotalS2       | 143,79 | 2,01E-01 |
| FBG1n/G1n         | 173,56 | 6,89E-02 | GP16                    | 171,82 | 1,23E-01 |
| FtotalS1/FtotalS2 | 178,71 | 6,73E-02 | G1n                     | 172,22 | 1,62E-01 |
| GP10              | 212,45 | 2,46E-02 | GP10                    | 183,49 | 1,01E-01 |
